# Supplementary material
Source: Springer Nature journal article supplement (https://www.springermedizin.de/resource/supplementary/13058_2011_2870_MOESM6_ESM.pdf/9702772)

## OS by PTEN in TNBC pts

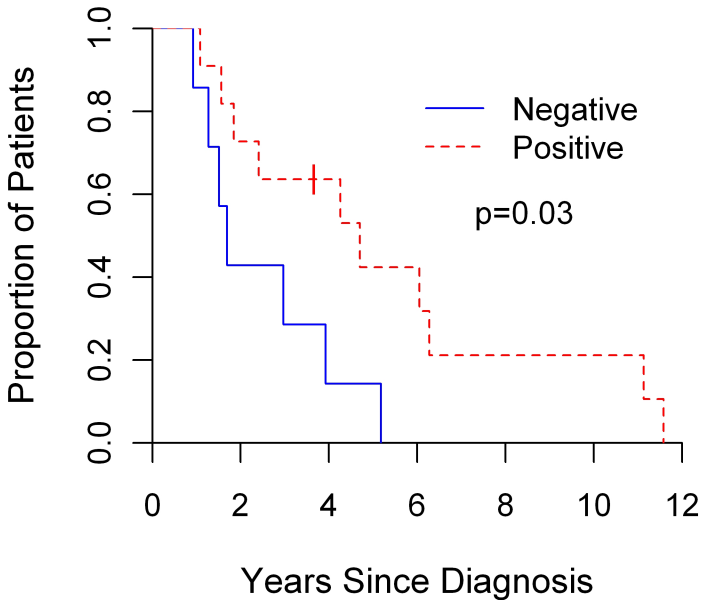

Supplement: MOESM6 [file 9702772]
